# Supplementary material for: A dual specificity kinase, DYRK1A, as a potential therapeutic target for head and neck squamous cell carcinoma
Source: PubMed Central journal article supplement (PMC5086852; doi:10.1038/srep36132), 2016-10-31

**A dual specificity kinase, DYRK1A, as a potential therapeutic target for head and neck squamous cell carcinoma**

Aneesha Radhakrishnan<sup>1,2</sup>, Vishalakshi Nanjappa<sup>1,3</sup>, Remya Raja<sup>1</sup>, Gajanan Sathe<sup>1,4</sup>, Vinuth N. Puttamalles<sup>1,3</sup>, Ankit P. Jain<sup>1,5</sup>, Sneha M. Pinto<sup>1</sup>, Sai A. Balaji<sup>6</sup>, Sandip Chavan<sup>1,4</sup>, Nandini A. Sahasrabudhe<sup>1</sup>, Premendu P. Mathur<sup>2,5</sup>, Mahesh M. Kumar<sup>7</sup>, T. S. Keshava Prasad<sup>1,3,8</sup>, Vani Santosh<sup>9</sup>, Geethanjali Sukumar<sup>1</sup>, Joseph A. Califano<sup>10,11</sup>, Annapoorni Rangarajan<sup>6</sup>, David Sidransky<sup>11</sup>, Akhilesh Pandey<sup>12,13,14,15</sup>, Harsha Gowda<sup>1,8\*</sup>, Aditi Chatterjee<sup>1,8\*</sup>

<sup>1</sup>Institute of Bioinformatics, International Technology Park, Bangalore, 560 066, India

<sup>2</sup>Department of Biochemistry and Molecular Biology, Pondicherry University, Puducherry 605014, India

<sup>3</sup>Amrita School of Biotechnology, Amrita University, Kollam 690 525, India

<sup>4</sup>Manipal University, Madhav Nagar, Manipal 576104, India

<sup>5</sup>School of Biotechnology, KIIT University, Bhubaneswar 751024, India

<sup>6</sup>Department of Molecular Reproduction, Development and Genetics, Indian Institute of Science, Bangalore, 560012, India

<sup>7</sup>Department of Neuro-Virology, National Institute of Mental Health and Neurosciences, Bangalore 560029, India

<sup>8</sup>YU-IOB Center for Systems Biology and Molecular Medicine, Yenepoya University, Mangalore 575018, India

<sup>9</sup>Department of Pathology, National Institute of Mental Health and Neurosciences, Bangalore 560029, India

<sup>10</sup>Milton J. Dance Head and Neck Center, Greater Baltimore Medical Center, Baltimore, MD 21204, USA

<sup>11</sup>Department of Otolaryngology-Head and Neck Surgery, Johns Hopkins University School of Medicine, Baltimore, MD 21231, USA

<sup>12</sup>McKusick-Nathans Institute of Genetic Medicine, <sup>13</sup>Departments of Biological Chemistry,

<sup>14</sup>Oncology and <sup>15</sup>Pathology, Johns Hopkins University School of Medicine, Baltimore, MD 21205, USA

**\*To whom correspondence should be addressed:**

Aditi Chatterjee, Ph.D.

Institute of Bioinformatics,

International Tech Park,

Bangalore-560 066, India

E-mail: [aditi@ibioinformatics.org](mailto:aditi@ibioinformatics.org)

Harsha Gowda, Ph.D.

Institute of Bioinformatics,

International Tech Park,

Bangalore-560 066, India

E-mail: [harsha@ibioinformatics.org](mailto:harsha@ibioinformatics.org)

## **Supplementary Figure legends**

### **Supplementary figure 1**

#### **Experimental workflow employed for mass spectrometry analysis.**

Equal amount of protein from each cell line were extracted, digested and labeled with TMT reagents. The labeled samples were pooled and purified using Sep-Pak C<sub>18</sub> columns. The purified sample was enriched for tyrosine using phosphotyrosine antibody. The phosphotyrosine enriched samples were analyzed in Orbitrap velos mass spectrometer. The MS/MS data was searched against Refseq 65 protein database using SEQUEST and Mascot search algorithms.

### **Supplementary figure 2**

Effect of DYRK1A inhibition using harmine on HNSCC cell proliferation (\*p<0.05)

# Experimental workflow employed for mass spectrometry analysis

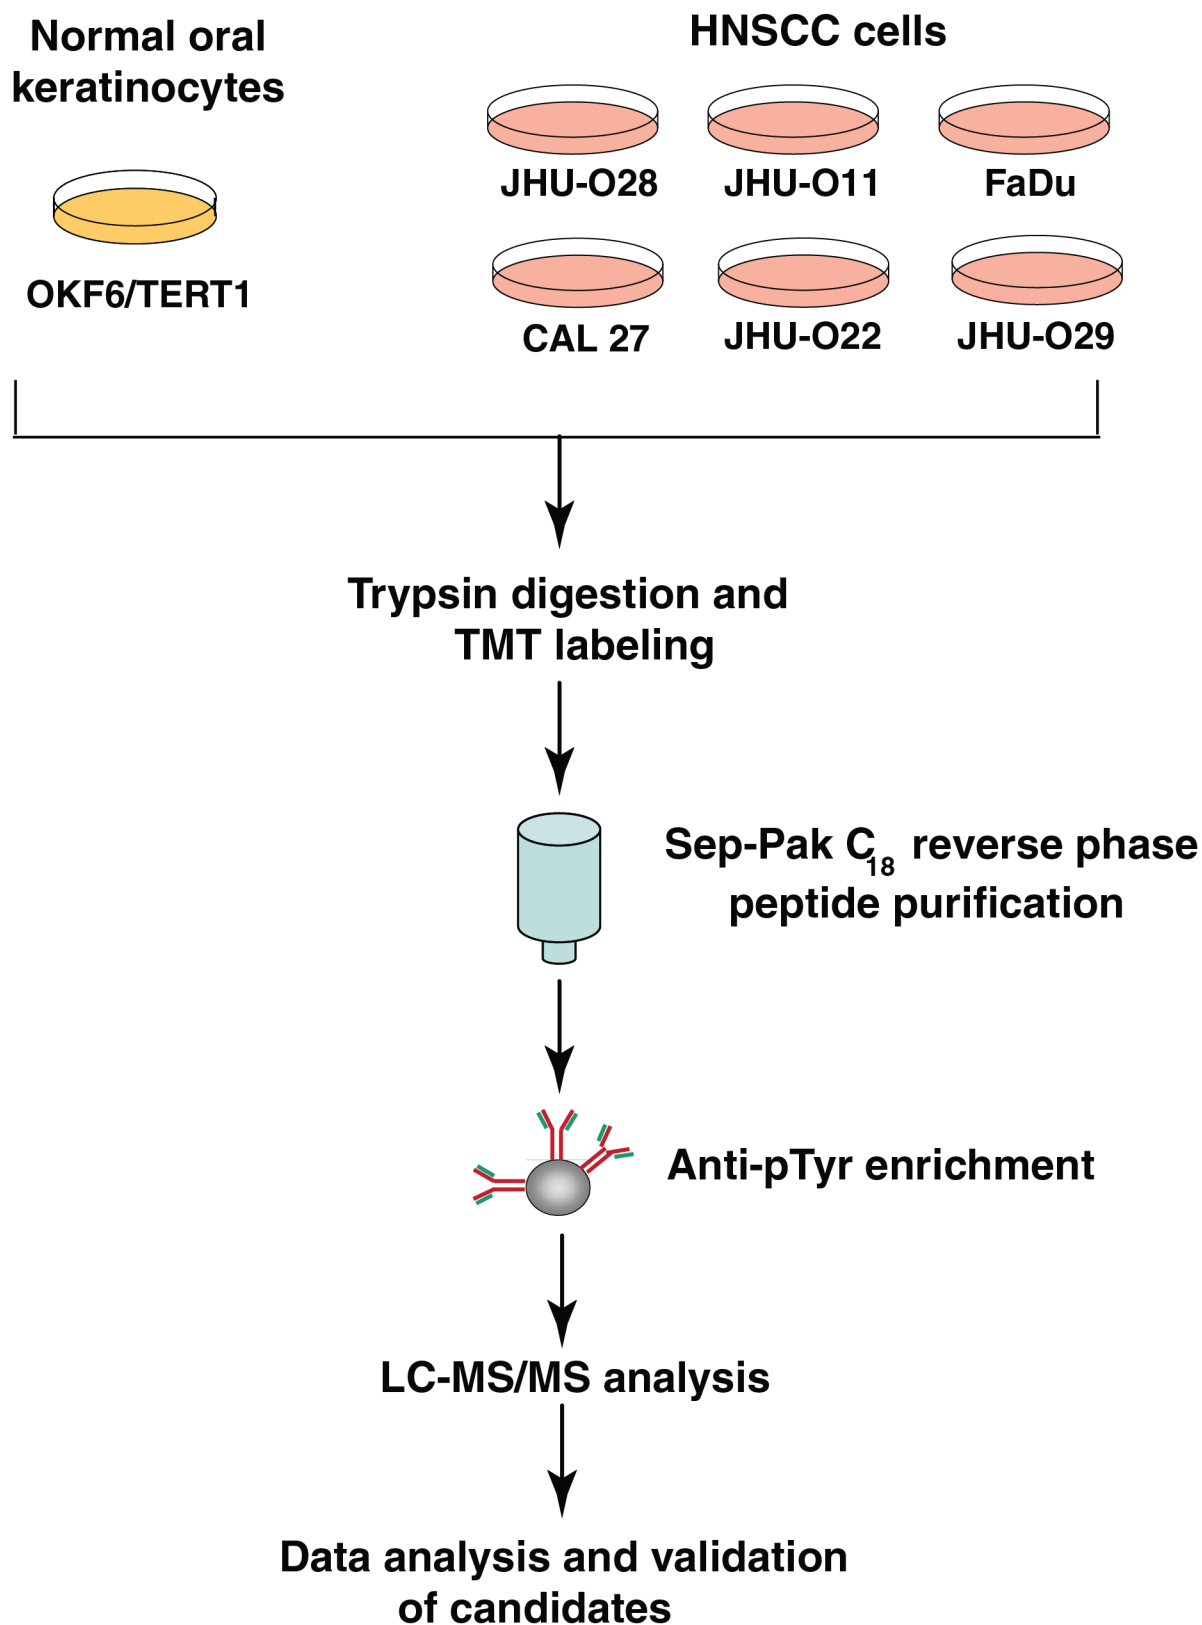

# Effect of DYRK1A inhibition using harmine on HNSCC cell proliferation

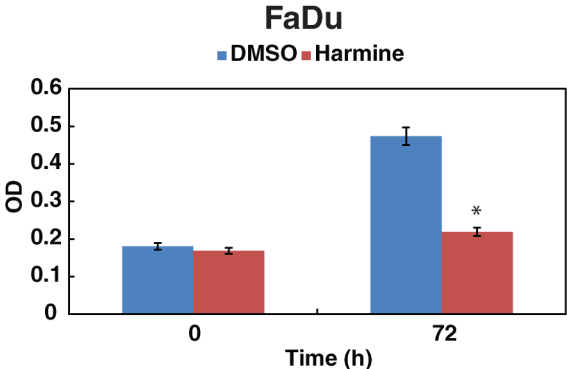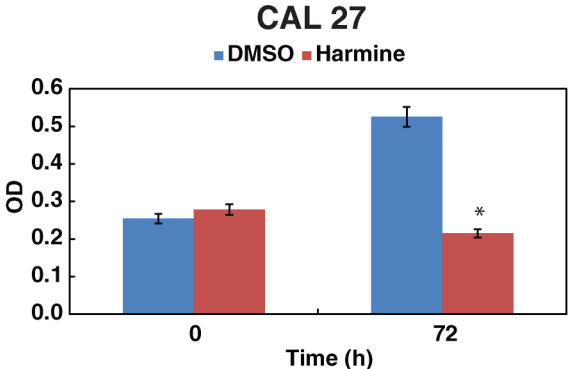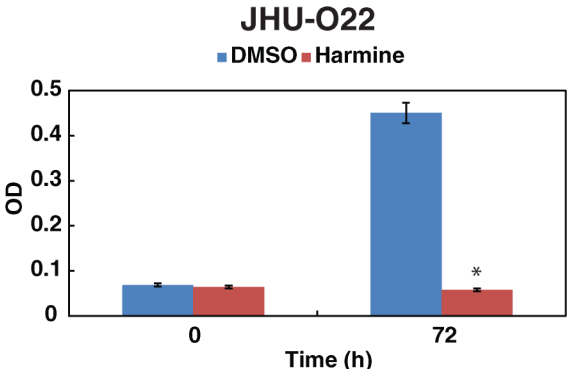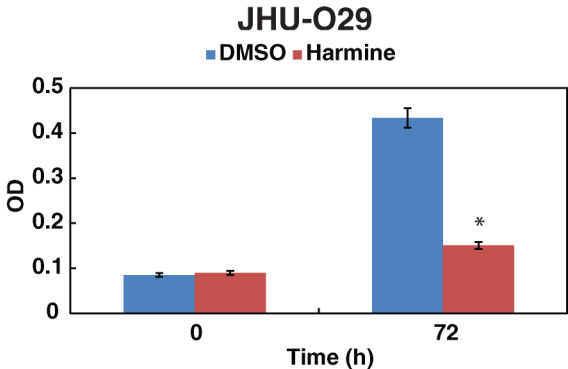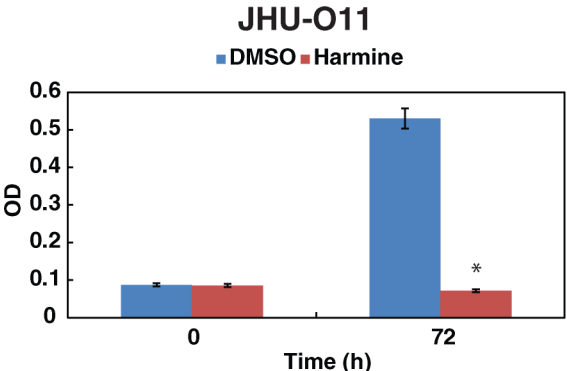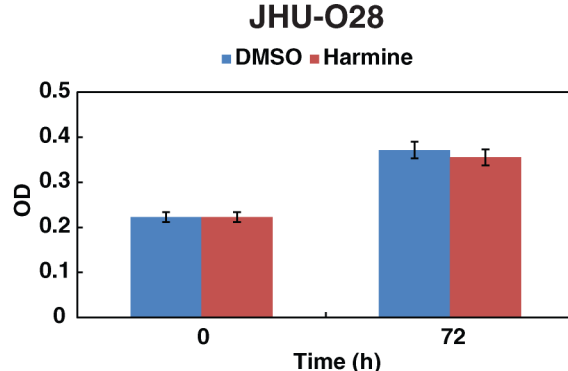

Supplement: srep36132-s1.pdf [file srep36132-s1.pdf]
